# Supplementary material
Source: publisher figshare collection journal article supplement (https://tandf.figshare.com/ndownloader/files/22295016)
Supplement: Supplementary file 1 [file 22295016]

**Supplementary Material for:**

**Nanosized silver, but not titanium dioxide or zinc oxide, enhances oxidative stress and inflammatory response by inducing 5-HETE activation in THP-1 cells**

Wing-Lam Poon,1* Jetty Chung-Yung Lee,1* Kin Sum Leung1, Harri Alenius,2,3 Hani El-Nezami,1,4§ Piia Karisola2§

1School of Biological Sciences, University of Hong Kong, Pokfulam Road, Hong Kong

2Human Microbiome Research Program, University of Helsinki, Haartmaninkatu 3, 00290 Helsinki, Finland

3Institute of Environmental Medicine (IMM), Karolinska Institutet, Stockholm 171 77, Sweden

4Nutrition and health, Institute of Public Health and Clinical Nutrition, University of Eastern Finland, P.O. Box 1627, 70211 Kuopio, Finland

*These authors contributed equally to this work.

§Address correspondence to piia.karisola@helsinki.fi and elnezami@hku.hk

| **6h** | **Ctrl** | **n-TiO2** | **b-TiO2** | **n-ZnO** | **b-ZnO** | **n-Ag** | **i-Ag** |
| --- | --- | --- | --- | --- | --- | --- | --- |
| **Polyunsaturated fatty acids (PUFAs)** | | | | | | | |
| **AA** (ng/mg protein) | 189.86 ± 34.52 | 208.71 ± 21.12 | 221.46 ± 64.80 | 177.36 ± 38.23 | 230.08 ± 27.47 | 165.94 ± 42.48 | 185.86 ± 55.11 |
| **AdA** (ng/mg protein) | 29.73 ± 11.00 | 30.79 ± 11.97 | 33.70 ± 7.85 | 30.77 ± 13.50 | 32.11 ± 10.17 | 24.80 ± 11.09 | 26.07 ± 14.89 |
| **DHA** (ng/mg protein) | 0.196 ± 0.062 | 0.251 ± 0.061 | 0.187 ± 0.025 | 0.186 ± 0.039 | 0.205 ± 0.042 | 0.137 ± 0.040 | 0.141 ± 0.058 |
| **DPA** (ng/mg protein) | 616.31 ± 240.48 | 827.23 ± 364.45 | 658.72 ± 133.66 | 660.76 ± 218.60 | 654.77 ± 112.22 | 494.41 ± 130.41 | 597.43 ± 399.39 |
| **EPA** (ng/mg protein) | 12160.13 ± 5208.53 | 14607.68 ± 7794.39 | 16070.10 ± 10408.98 | 14123.28 ± 7246.06 | 18642.42 ± 9716.05 | 11116.70 ± 4237.84 | 10043.44 ± 3859.69 |
| **Enzymatically oxidized lipid metabolites** | | | | | | | |
| **5-HETE : AA** | 0.00469 ± 0.00168 | 0.00567 ± 0.00195 | 0.00487 ± 0.00118 | 0.00397 ± 0.00129 | 0.00465 ± 0.00082 | 0.00495 ± 0.00193 | 0.00416 ± 0.00131 |
| **8-HETE : AA** | 0.00298 ± 0.00127 | 0.00300 ± 0.00055 | 0.00254 ± 0.00129 | 0.00258 ± 0.00083 | 0.00277 ± 0.00047 | 0.00278 ± 0.00129 | 0.00225 ± 0.00051 |
| **9-HETE : AA** | 0.01772 ± 0.00485 | 0.01698 ± 0.00545 | 0.01064 ± 0.00857 | 0.02065 ± 0.00954 | 0.01947 ± 0.00725 | 0.02257 ± 0.01478 | 0.01062 ± 0.00286 |
| **11-HETE : AA** | 0.00279 ± 0.00122 | 0.00296 ± 0.00117 | 0.00280 ± 0.00158 | 0.00247 ± 0.00178 | 0.00312 ± 0.00122 | 0.00259 ± 0.00180 | 0.00195 ± 0.00075 |
| **12-HETE : AA** | 0.00699 ± 0.00200 | 0.00601 ± 0.00191 | 0.00665 ± 0.00292 | 0.00805 ± 0.00258 | 0.00711 ± 0.00281 | 0.00843 ± 0.00486 | 0.00648 ± 0.00213 |
| **15-HETE : AA** | 0.00714 ± 0.00243 | 0.00885 ± 0.00417 | 0.00713 ± 0.00315 | 0.00823 ± 0.00229 | 0.00926 ± 0.00363 | 0.00944 ± 0.00389 | 0.00747 ± 0.00188 |
| **4-HDoHE : DHA** | 11.54 ± 4.21 | 14.44 ± 7.10 | 14.30 ± 4.28 | 9.04 ± 1.47 | 9.91 ± 1.88 | 13.20 ± 5.41 | 17.67 ± 8.55 |
| **7-HDoHE : DHA** | 2.41 ± 1.01 | 2.67 ± 1.16 | 3.51 ± 0.48 | 1.98 ± 0.77 | 2.45 ± 0.74 | 2.88 ± 0.90 | 4.27 ± 2.47 |
| **8-HDoHE : DHA** | 17.23 ± 6.47 | 20.76 ± 9.33 | 22.13 ± 13.10 | 18.85 ± 7.89 | 23.50 ± 8.68 | 25.43 ± 11.32 | 25.71 ± 4.94 |
| **11-HDoHE : DHA** | 8.72 ± 2.19 | 9.24 ± 3.41 | 8.31 ± 4.50 | 7.99 ± 2.69 | 9.35 ± 2.64 | 10.90 ± 4.19 | 11.41 ± 1.48 |
| **14-HDoHE : DHA** | 20.27 ± 5.62 | 26.70 ± 13.20 | 32.88 ± 21.15 | 29.62 ± 10.04 | 31.78 ± 15.72 | 25.96 ± 15.37 | 42.15 ± 15.67 |
| **17-HDoHE : DHA** | 9.80 ± 4.62 | 9.28 ± 2.44 | 11.00 ± 5.57 | 9.83 ± 5.36 | 12.48 ± 4.56 | 12.91 ± 8.17 | 17.28 ± 7.01 |
| **Non-enzymatically oxidized lipid metabolites** | | | | | | | |
| **F2-IsoPs : AA** | 0.00842 ± 0.00182 | 0.01113 ± 0.00389 | 0.00901 ± 0.00146 | 0.00780 ± 0.00139 | 0.00811 ± 0.00109 | 0.01120 ± 0.00423 | 0.01118 ± 0.00488 |

**Table S1(A). Levels of PUFAs and other detectable PUFA metabolites at 6h.** Levels of PUFAs were expressed as absolute quantity normalized with the protein content. Levels of PUFA metabolites were expressed as ratio of metabolite to precursor PUFA. All results are shown as mean ± SD (n = 5). Significance tested by one-way ANOVA.

| **24h** | **Ctrl** | **n-TiO2** | **b-TiO2** | **n-ZnO** | **b-ZnO** | **n-Ag** | **i-Ag** |
| --- | --- | --- | --- | --- | --- | --- | --- |
| **Polyunsaturated fatty acids (PUFAs)** | | | | | | | |
| **AA (ng/mg protein)** | 190.73 ± 39.39 | 196.90 ± 45.08 | 225.58 ± 73.56 | 239.93 ± 57.54 | 191.43 ± 51.26 | 192.40 ± 17.45 | 189.78 ± 34.21 |
| **AdA (ng/mg protein)** | 39.23 ± 13.17 | 39.94 ± 6.15 | 38.81 ± 8.83 | 39.78 ± 3.50 | 34.08 ± 6.86 | 33.67 ± 7.56 | 37.31 ± 10.50 |
| **DHA (ng/mg protein)** | 0.187 ± 0.072 | 0.128 ± 0.032 | 0.191 ± 0.096 | 0.234 ± 0.151 | 0.244 ± 0.076 | 0.204 ± 0.059 | 0.232 ± 0.033 |
| **DPA (ng/mg protein)** | 668.48 ± 320.89 | 637.38 ± 311.20 | 701.29 ± 364.75 | 756.41 ± 268.12 | 743.60 ± 364.28 | 829.23 ± 362.44 | 838.60 ± 211.32 |
| **EPA (ng/mg protein)** | 11361.80 ± 4585.70 | 14229.71 ± 10682.56 | 16718.44 ± 10464.01 | 17637.94 ± 13744.15 | 14637.73 ± 8091.32 | 15271.89 ± 8221.45 | 17264.63 ± 12535.77 |
| **Enzymatically oxidized lipid metabolites** | | | | | | | |
| **5-HETE : AA** | 0.00372 ± 0.00088 | 0.00447 ± 0.00091 | 0.00461 ± 0.00077 | 0.00446 ± 0.00165 | 0.00427 ± 0.00077 | 0.00660 ± 0.00135** | 0.00438 ± 0.00126 |
| **8-HETE : AA** | 0.00319 ± 0.00222 | 0.00335 ± 0.00167 | 0.00354 ± 0.00189 | 0.00315 ± 0.00092 | 0.00273 ± 0.00095 | 0.00343 ± 0.00157 | 0.00291 ± 0.00112 |
| **9-HETE : AA** | 0.00964 ± 0.00671 | 0.01459 ± 0.00935 | 0.01957 ± 0.01605 | 0.01742 ± 0.00632 | 0.01325 ± 0.00702 | 0.02175 ± 0.01162 | 0.01701 ± 0.00590 |
| **11-HETE : AA** | 0.00219 ± 0.00110 | 0.00251 ± 0.00040 | 0.00229 ± 0.00157 | 0.00366 ± 0.00124 | 0.00266 ± 0.00100 | 0.00331 ± 0.00093 | 0.00303 ± 0.00181 |
| **12-HETE : AA** | 0.00365 ± 0.00195 | 0.00424 ± 0.00258 | 0.00478 ± 0.00284 | 0.00601 ± 0.00435 | 0.00474 ± 0.00299 | 0.00561 ± 0.00312 | 0.00485 ± 0.00295 |
| **15-HETE : AA** | 0.00424 ± 0.00273 | 0.00512 ± 0.00332 | 0.00537 ± 0.00375 | 0.00638 ± 0.00416 | 0.00582 ± 0.00334 | 0.00712 ± 0.00373 | 0.00609 ± 0.00326 |
| **4-HDoHE : DHA** | 8.77 ± 2.80 | 15.07 ± 7.27 | 12.17 ± 9.03 | 9.97 ± 4.16 | 7.74 ± 2.69 | 10.74 ± 3.57 | 9.96 ± 4.31 |
| **7- HDoHE : DHA** | 2.46 ± 2.03 | 4.60 ± 1.91 | 2.31 ± 0.78 | 2.48 ± 1.96 | 2.03 ± 0.76 | 2.72 ± 0.82 | 2.43 ± 1.49 |
| **8- HDoHE : DHA** | 12.26 ± 6.85 | 19.20 ± 14.19 | 13.34 ± 5.51 | 18.29 ± 9.22 | 11.04 ± 7.61 | 17.75 ± 9.65 | 14.36 ± 7.44 |
| **11- HDoHE : DHA** | 4.52 ± 2.94 | 6.03 ± 2.53 | 5.29 ± 0.77 | 5.97 ± 2.58 | 4.77 ± 2.45 | 7.47 ± 4.22 | 4.72 ± 2.86 |
| **14- HDoHE : DHA** | 19.30 ± 5.67 | 29.34 ± 4.97 | 23.12 ± 6.95 | 23.18 ± 6.06 | 12.47 ± 7.73 | 20.61 ± 9.06 | 24.15 ± 10.70 |
| **17- HDoHE : DHA** | 6.54 ± 2.90 | 6.69 ± 0.66 | 6.98 ± 2.77 | 10.28 ± 7.02 | 6.87 ± 6.66 | 9.88 ± 6.85 | 8.01 ± 8.45 |
| **Non-enzymatically oxidized lipid metabolites** | | | | | | | |
| **F2-IsoPs : AA** | 0.00897 ± 0.00318 | 0.01003 ± 0.00364 | 0.01075 ± 0.00310 | 0.01279 ± 0.00963 | 0.01177 ± 0.00441 | 0.01262 ± 0.00332 | 0.01134 ± 0.00309 |

**Table S1(B). Levels of PUFAs and other detectable PUFA metabolites at 24h.** Levels of PUFAs were expressed as absolute quantity normalized with the protein content. Levels of PUFA metabolites were expressed as ratio of metabolite to precursor PUFA. All results are shown as mean ± SD (n = 5). Significance level **p < 0.01 determined by one-way ANOVA. F2-Isoprostanes (F2-IsoPs)

**Figure S1. Levels of HETEs at 6h.** No significant changes on the AA-to-HETE conversions were observed at 6h across all exposures. Results are expressed as mean ± SD (n = 5).
